# Supplementary material
Source: publisher site journal article supplement (https://www.spandidos-publications.com/8411/downloadSupplementary)
Supplement: Supplementary file 1 [file downloadSupplementary]

## Sheet: Sheet1
Table SVII. Correlation analysis between mitochondrial autophagy pathway and differential glycolysis-related genes.
cor_pairs	lower	r	upper	p
GALE-GOBP_MITOPHAGY	-0.12932	-0.0710993	-0.0123905	0.0176763
STMN1-GOBP_MITOPHAGY	-0.0745208	-0.0158295	0.042971	0.597819
SLC2A1-GOBP_MITOPHAGY	-0.182239	-0.124815	-0.0665422	2.97092e-05
ARTN-GOBP_MITOPHAGY	-0.0558157	0.00295456	0.0617044	0.921568
PGM1-GOBP_MITOPHAGY	-0.261127	-0.20552	-0.148554	4.42748e-12
AK4-GOBP_MITOPHAGY	-0.164778	-0.107054	-0.0485989	0.000346549
DEPDC1-GOBP_MITOPHAGY	-0.0490359	0.00975274	0.0684741	0.745174
EFNA3-GOBP_MITOPHAGY	-0.0291298	0.0296816	0.0882882	0.3225
LHX9-GOBP_MITOPHAGY	-0.0249785	0.0338317	0.0924086	0.259431
PPFIA4-GOBP_MITOPHAGY	-0.108369	-0.0499265	0.00886002	0.0959529
SDC1-GOBP_MITOPHAGY	-0.237452	-0.18122	-0.123778	1.13264e-09
CENPA-GOBP_MITOPHAGY	0.00566371	0.0644028	0.122699	0.0316819
UGP2-GOBP_MITOPHAGY	-0.300064	-0.245634	-0.189611	9.31185e-17
LCT-GOBP_MITOPHAGY	0.0113828	0.0700965	0.128329	0.0193465
CXCR4-GOBP_MITOPHAGY	-0.280771	-0.225735	-0.169219	2.51694e-14
CHPF-GOBP_MITOPHAGY	-0.29538	-0.240799	-0.184651	3.80648e-16
NUP210-GOBP_MITOPHAGY	-0.279004	-0.223915	-0.167356	4.09502e-14
PFKFB4-GOBP_MITOPHAGY	-0.22952	-0.173094	-0.115509	6.16758e-09
ADH4-GOBP_MITOPHAGY	-0.0552896	0.00348226	0.0622301	0.907618
ADH6-GOBP_MITOPHAGY	-0.0543044	0.00447041	0.0632144	0.881575
ADH1A-GOBP_MITOPHAGY	-0.13762	-0.0795024	-0.0208391	0.00796497
ADH1B-GOBP_MITOPHAGY	-0.245583	-0.189558	-0.13227	1.8328e-10
ADH1C-GOBP_MITOPHAGY	-0.231158	-0.174771	-0.117215	4.37525e-09
SAP30-GOBP_MITOPHAGY	-0.16467	-0.106944	-0.0484881	0.00035147
VCAN-GOBP_MITOPHAGY	-0.359061	-0.306772	-0.252565	1.10686e-25
KIF20A-GOBP_MITOPHAGY	-0.0552113	0.00356079	0.0623083	0.905544
HMMR-GOBP_MITOPHAGY	-0.127061	-0.0688145	-0.0100948	0.0216811
IER3-GOBP_MITOPHAGY	-0.248212	-0.192256	-0.13502	9.98473e-11
PGK2-GOBP_MITOPHAGY	-0.0258338	0.0329768	0.09156	0.27167
ME1-GOBP_MITOPHAGY	-0.101259	-0.0427524	0.0160485	0.154059
NT5E-GOBP_MITOPHAGY	-0.375713	-0.324108	-0.270499	1.23144e-28
RRAGD-GOBP_MITOPHAGY	-0.138609	-0.0805044	-0.0218472	0.00720743
EGFR-GOBP_MITOPHAGY	-0.197351	-0.140217	-0.0821329	2.65537e-06
CLDN3-GOBP_MITOPHAGY	-0.122952	-0.0646589	-0.00592086	0.0310086
MET-GOBP_MITOPHAGY	-0.183051	-0.125642	-0.0673791	2.62713e-05
GFUS-GOBP_MITOPHAGY	-0.164256	-0.106524	-0.0480638	0.000370937
VLDLR-GOBP_MITOPHAGY	-0.198128	-0.141009	-0.0829358	2.32817e-06
FBP1-GOBP_MITOPHAGY	-0.288412	-0.23361	-0.177283	2.91851e-15
COL5A1-GOBP_MITOPHAGY	-0.364499	-0.31243	-0.258413	1.26362e-26
PFKFB3-GOBP_MITOPHAGY	-0.352868	-0.300335	-0.245914	1.23518e-24
CDK1-GOBP_MITOPHAGY	-0.035625	0.0231841	0.0818332	0.439704
P4HA1-GOBP_MITOPHAGY	-0.242313	-0.186204	-0.128853	3.85218e-10
LDHC-GOBP_MITOPHAGY	-0.102342	-0.0438452	0.0149539	0.143794
CHST1-GOBP_MITOPHAGY	-0.147159	-0.0891691	-0.0305687	0.00290686
PC-GOBP_MITOPHAGY	-0.244274	-0.188215	-0.130903	2.4713e-10
PPP2R1B-GOBP_MITOPHAGY	-0.254346	-0.198553	-0.141443	2.33671e-11
B3GAT1-GOBP_MITOPHAGY	-0.113236	-0.0548407	0.00393254	0.067415
FKBP4-GOBP_MITOPHAGY	-0.251833	-0.195973	-0.138811	4.26183e-11
GAPDH-GOBP_MITOPHAGY	-0.160785	-0.102997	-0.0445062	0.000578585
ENO2-GOBP_MITOPHAGY	-0.175518	-0.117974	-0.059627	7.97415e-05
GYS2-GOBP_MITOPHAGY	-0.0960077	-0.0374584	0.0213491	0.211772
DCN-GOBP_MITOPHAGY	-0.419395	-0.369746	-0.317892	2.20341e-37
ALDH2-GOBP_MITOPHAGY	-0.285592	-0.230703	-0.174305	6.52614e-15
IRS2-GOBP_MITOPHAGY	-0.240347	-0.184188	-0.126799	5.9808e-10
EGLN3-GOBP_MITOPHAGY	-0.186423	-0.129076	-0.0708533	1.5642e-05
PYGL-GOBP_MITOPHAGY	-0.231484	-0.175105	-0.117554	4.08471e-09
FUT8-GOBP_MITOPHAGY	-0.285888	-0.231008	-0.174618	5.99966e-15
ISG20-GOBP_MITOPHAGY	-0.103147	-0.0446568	0.0141409	0.136515
ALDH1A3-GOBP_MITOPHAGY	-0.187521	-0.130195	-0.0719848	1.31745e-05
POLR3K-GOBP_MITOPHAGY	-0.213781	-0.156993	-0.0991467	1.40706e-07
CACNA1H-GOBP_MITOPHAGY	-0.15625	-0.0983928	-0.0398627	0.0010132
PGP-GOBP_MITOPHAGY	-0.106785	-0.0483279	0.0104624	0.107086
CLDN9-GOBP_MITOPHAGY	0.0270149	0.0856395	0.143677	0.00424819
ALDOA-GOBP_MITOPHAGY	-0.219666	-0.163009	-0.105257	4.53167e-08
CHST6-GOBP_MITOPHAGY	-0.199489	-0.142397	-0.0843423	1.846e-06
SLC2A4-GOBP_MITOPHAGY	-0.220476	-0.163838	-0.106098	3.86449e-08
ALDH3A1-GOBP_MITOPHAGY	-0.0831063	-0.0244652	0.0343448	0.414841
ALDOC-GOBP_MITOPHAGY	-0.170073	-0.112436	-0.0540326	0.000170753
SLC4A1-GOBP_MITOPHAGY	-0.0990904	-0.0405661	0.018238	0.176251
SLC25A10-GOBP_MITOPHAGY	0.0154505	0.0741437	0.132328	0.0133541
SLC16A3-GOBP_MITOPHAGY	-0.133488	-0.0753183	-0.0166314	0.0119543
ANGPTL4-GOBP_MITOPHAGY	-0.153051	-0.0951463	-0.0365903	0.00148355
GAPDHS-GOBP_MITOPHAGY	0.0891334	0.147123	0.204119	8.23933e-07
ACSS2-GOBP_MITOPHAGY	-0.274384	-0.219157	-0.162489	1.43235e-13
SPAG4-GOBP_MITOPHAGY	0.0377918	0.0963384	0.154226	0.0012914
AURKA-GOBP_MITOPHAGY	-0.030814	0.0279973	0.0866154	0.350732
PCK1-GOBP_MITOPHAGY	-0.198156	-0.141038	-0.0829646	2.31717e-06
TFF3-GOBP_MITOPHAGY	-0.207576	-0.150653	-0.092713	4.43608e-07
GAL3ST1-GOBP_MITOPHAGY	-0.139618	-0.0815261	-0.0228751	0.0065022
KDELR3-GOBP_MITOPHAGY	-0.191844	-0.134601	-0.0764446	6.60698e-06
BIK-GOBP_MITOPHAGY	-0.165578	-0.107867	-0.0494197	0.000312031
MIOX-GOBP_MITOPHAGY	-0.0624915	-0.00374468	0.055028	0.900691
PFKFB1-GOBP_MITOPHAGY	-0.146292	-0.0882901	-0.0296835	0.00319887
GPC4-GOBP_MITOPHAGY	-0.294523	-0.239915	-0.183745	4.90826e-16
GPC3-GOBP_MITOPHAGY	-0.277363	-0.222225	-0.165627	6.41011e-14
TKTL1-GOBP_MITOPHAGY	-0.0871162	-0.0285016	0.0303098	0.342121
GALE-GOBP_PARKIN_MEDIATED_STIMULATION_OF_MITOPHAGY_IN_R	-0.0343934	0.0244165	0.0830579	0.415771
STMN1-GOBP_PARKIN_MEDIATED_STIMULATION_OF_MITOPHAGY_IN_R	-0.0606325	-0.00187866	0.0568882	0.950081
SLC2A1-GOBP_PARKIN_MEDIATED_STIMULATION_OF_MITOPHAGY_IN_R	-0.144254	-0.086224	-0.0276033	0.00399309
ARTN-GOBP_PARKIN_MEDIATED_STIMULATION_OF_MITOPHAGY_IN_R	-0.035532	0.0232772	0.0819257	0.437868
PGM1-GOBP_PARKIN_MEDIATED_STIMULATION_OF_MITOPHAGY_IN_R	-0.180151	-0.12269	-0.0643933	4.05989e-05
AK4-GOBP_PARKIN_MEDIATED_STIMULATION_OF_MITOPHAGY_IN_R	-0.108966	-0.0505289	0.00825616	0.0920058
DEPDC1-GOBP_PARKIN_MEDIATED_STIMULATION_OF_MITOPHAGY_IN_R	-0.104941	-0.0464665	0.0123278	0.121311
EFNA3-GOBP_PARKIN_MEDIATED_STIMULATION_OF_MITOPHAGY_IN_R	0.0221867	0.0808418	0.138942	0.00696728
LHX9-GOBP_PARKIN_MEDIATED_STIMULATION_OF_MITOPHAGY_IN_R	-0.0779963	-0.0193243	0.0394811	0.519558
PPFIA4-GOBP_PARKIN_MEDIATED_STIMULATION_OF_MITOPHAGY_IN_R	-0.109541	-0.051109	0.00767462	0.088329
SDC1-GOBP_PARKIN_MEDIATED_STIMULATION_OF_MITOPHAGY_IN_R	-0.116795	-0.0584357	0.000326021	0.0512971
CENPA-GOBP_PARKIN_MEDIATED_STIMULATION_OF_MITOPHAGY_IN_R	-0.0663169	-0.00758591	0.0511975	0.800424
UGP2-GOBP_PARKIN_MEDIATED_STIMULATION_OF_MITOPHAGY_IN_R	-0.228307	-0.171851	-0.114244	7.93748e-09
LCT-GOBP_PARKIN_MEDIATED_STIMULATION_OF_MITOPHAGY_IN_R	-0.0247991	0.034011	0.0925866	0.256913
CXCR4-GOBP_PARKIN_MEDIATED_STIMULATION_OF_MITOPHAGY_IN_R	-0.15289	-0.0949827	-0.0364254	0.00151189
CHPF-GOBP_PARKIN_MEDIATED_STIMULATION_OF_MITOPHAGY_IN_R	-0.125922	-0.0676623	-0.00893729	0.0239845
NUP210-GOBP_PARKIN_MEDIATED_STIMULATION_OF_MITOPHAGY_IN_R	-0.230035	-0.173621	-0.116044	5.53907e-09
PFKFB4-GOBP_PARKIN_MEDIATED_STIMULATION_OF_MITOPHAGY_IN_R	-0.137339	-0.0792177	-0.0205528	0.00819277
ADH4-GOBP_PARKIN_MEDIATED_STIMULATION_OF_MITOPHAGY_IN_R	-0.0625529	-0.00380631	0.0549666	0.899065
ADH6-GOBP_PARKIN_MEDIATED_STIMULATION_OF_MITOPHAGY_IN_R	-0.0578535	0.000910142	0.0596675	0.975804
ADH1A-GOBP_PARKIN_MEDIATED_STIMULATION_OF_MITOPHAGY_IN_R	-0.0603101	-0.00155507	0.0572107	0.958671
ADH1B-GOBP_PARKIN_MEDIATED_STIMULATION_OF_MITOPHAGY_IN_R	-0.0826718	-0.0240279	0.0347818	0.423232
ADH1C-GOBP_PARKIN_MEDIATED_STIMULATION_OF_MITOPHAGY_IN_R	-0.0712829	-0.012575	0.0462197	0.675166
SAP30-GOBP_PARKIN_MEDIATED_STIMULATION_OF_MITOPHAGY_IN_R	-0.0884442	-0.0298387	0.0289727	0.319945
VCAN-GOBP_PARKIN_MEDIATED_STIMULATION_OF_MITOPHAGY_IN_R	-0.216308	-0.159576	-0.10177	8.6955e-08
KIF20A-GOBP_PARKIN_MEDIATED_STIMULATION_OF_MITOPHAGY_IN_R	-0.0753525	-0.0166657	0.0421361	0.578614
HMMR-GOBP_PARKIN_MEDIATED_STIMULATION_OF_MITOPHAGY_IN_R	-0.139164	-0.0810666	-0.0224128	0.00681129
IER3-GOBP_PARKIN_MEDIATED_STIMULATION_OF_MITOPHAGY_IN_R	-0.124618	-0.0663437	-0.00761284	0.0268778
PGK2-GOBP_PARKIN_MEDIATED_STIMULATION_OF_MITOPHAGY_IN_R	-0.0145624	0.044236	0.10273	0.140253
ME1-GOBP_PARKIN_MEDIATED_STIMULATION_OF_MITOPHAGY_IN_R	-0.131392	-0.0731965	-0.0144983	0.0145863
NT5E-GOBP_PARKIN_MEDIATED_STIMULATION_OF_MITOPHAGY_IN_R	-0.227732	-0.171263	-0.113646	8.93875e-09
RRAGD-GOBP_PARKIN_MEDIATED_STIMULATION_OF_MITOPHAGY_IN_R	-0.160347	-0.102552	-0.0440573	0.000611394
EGFR-GOBP_PARKIN_MEDIATED_STIMULATION_OF_MITOPHAGY_IN_R	-0.169509	-0.111862	-0.053453	0.000184419
CLDN3-GOBP_PARKIN_MEDIATED_STIMULATION_OF_MITOPHAGY_IN_R	-0.0624213	-0.00367422	0.0550982	0.90255
MET-GOBP_PARKIN_MEDIATED_STIMULATION_OF_MITOPHAGY_IN_R	-0.164885	-0.107163	-0.0487089	0.000341722
GFUS-GOBP_PARKIN_MEDIATED_STIMULATION_OF_MITOPHAGY_IN_R	-0.0501556	0.00863038	0.0673568	0.773649
VLDLR-GOBP_PARKIN_MEDIATED_STIMULATION_OF_MITOPHAGY_IN_R	-0.171533	-0.113921	-0.0555323	0.00013968
FBP1-GOBP_PARKIN_MEDIATED_STIMULATION_OF_MITOPHAGY_IN_R	-0.14258	-0.0845273	-0.0258953	0.00477471
COL5A1-GOBP_PARKIN_MEDIATED_STIMULATION_OF_MITOPHAGY_IN_R	-0.182409	-0.124988	-0.0667176	2.89548e-05
PFKFB3-GOBP_PARKIN_MEDIATED_STIMULATION_OF_MITOPHAGY_IN_R	-0.206813	-0.149874	-0.0919232	5.09155e-07
CDK1-GOBP_PARKIN_MEDIATED_STIMULATION_OF_MITOPHAGY_IN_R	-0.0934557	-0.0348868	0.0239229	0.244859
P4HA1-GOBP_PARKIN_MEDIATED_STIMULATION_OF_MITOPHAGY_IN_R	-0.167599	-0.109921	-0.0514932	0.000238625
LDHC-GOBP_PARKIN_MEDIATED_STIMULATION_OF_MITOPHAGY_IN_R	-0.104178	-0.0456971	0.0130987	0.127606
CHST1-GOBP_PARKIN_MEDIATED_STIMULATION_OF_MITOPHAGY_IN_R	-0.129106	-0.0708827	-0.0121728	0.0180261
PC-GOBP_PARKIN_MEDIATED_STIMULATION_OF_MITOPHAGY_IN_R	-0.138103	-0.0799913	-0.021331	0.00758688
PPP2R1B-GOBP_PARKIN_MEDIATED_STIMULATION_OF_MITOPHAGY_IN_R	-0.233587	-0.177259	-0.119746	2.61295e-09
B3GAT1-GOBP_PARKIN_MEDIATED_STIMULATION_OF_MITOPHAGY_IN_R	-0.0739258	-0.0152314	0.0435682	0.611732
FKBP4-GOBP_PARKIN_MEDIATED_STIMULATION_OF_MITOPHAGY_IN_R	-0.152142	-0.0942236	-0.0356605	0.00164996
GAPDH-GOBP_PARKIN_MEDIATED_STIMULATION_OF_MITOPHAGY_IN_R	-0.111078	-0.0526615	0.00611804	0.0790683
ENO2-GOBP_PARKIN_MEDIATED_STIMULATION_OF_MITOPHAGY_IN_R	-0.125647	-0.067384	-0.0086577	0.0245717
GYS2-GOBP_PARKIN_MEDIATED_STIMULATION_OF_MITOPHAGY_IN_R	-0.0830776	-0.0244364	0.0343736	0.415391
DCN-GOBP_PARKIN_MEDIATED_STIMULATION_OF_MITOPHAGY_IN_R	-0.205369	-0.1484	-0.0904276	6.59746e-07
ALDH2-GOBP_PARKIN_MEDIATED_STIMULATION_OF_MITOPHAGY_IN_R	-0.111311	-0.0528963	0.0058826	0.0777389
IRS2-GOBP_PARKIN_MEDIATED_STIMULATION_OF_MITOPHAGY_IN_R	-0.251306	-0.195431	-0.138258	4.82965e-11
EGLN3-GOBP_PARKIN_MEDIATED_STIMULATION_OF_MITOPHAGY_IN_R	-0.0838752	-0.0252391	0.0335713	0.400233
PYGL-GOBP_PARKIN_MEDIATED_STIMULATION_OF_MITOPHAGY_IN_R	-0.12621	-0.067953	-0.00922925	0.0233843
FUT8-GOBP_PARKIN_MEDIATED_STIMULATION_OF_MITOPHAGY_IN_R	-0.204047	-0.14705	-0.0890585	8.34546e-07
ISG20-GOBP_PARKIN_MEDIATED_STIMULATION_OF_MITOPHAGY_IN_R	-0.0830603	-0.0244189	0.0343911	0.415725
ALDH1A3-GOBP_PARKIN_MEDIATED_STIMULATION_OF_MITOPHAGY_IN_R	-0.127817	-0.0695788	-0.0108627	0.0202615
POLR3K-GOBP_PARKIN_MEDIATED_STIMULATION_OF_MITOPHAGY_IN_R	-0.0983594	-0.039829	0.018976	0.184245
CACNA1H-GOBP_PARKIN_MEDIATED_STIMULATION_OF_MITOPHAGY_IN_R	-0.10485	-0.0463747	0.0124197	0.122049
PGP-GOBP_PARKIN_MEDIATED_STIMULATION_OF_MITOPHAGY_IN_R	-0.0362194	0.0225892	0.081242	0.451532
CLDN9-GOBP_PARKIN_MEDIATED_STIMULATION_OF_MITOPHAGY_IN_R	-0.0159087	0.042892	0.101397	0.152718
ALDOA-GOBP_PARKIN_MEDIATED_STIMULATION_OF_MITOPHAGY_IN_R	-0.117287	-0.0589322	-0.000172189	0.0493479
CHST6-GOBP_PARKIN_MEDIATED_STIMULATION_OF_MITOPHAGY_IN_R	-0.145236	-0.0872203	-0.0286063	0.00359015
SLC2A4-GOBP_PARKIN_MEDIATED_STIMULATION_OF_MITOPHAGY_IN_R	-0.0990061	-0.0404811	0.0183231	0.17716
ALDH3A1-GOBP_PARKIN_MEDIATED_STIMULATION_OF_MITOPHAGY_IN_R	-0.0679513	-0.00922757	0.0495599	0.758457
ALDOC-GOBP_PARKIN_MEDIATED_STIMULATION_OF_MITOPHAGY_IN_R	-0.086437	-0.0278177	0.0309935	0.353832
SLC4A1-GOBP_PARKIN_MEDIATED_STIMULATION_OF_MITOPHAGY_IN_R	-0.124359	-0.0660817	-0.00734963	0.0274873
SLC25A10-GOBP_PARKIN_MEDIATED_STIMULATION_OF_MITOPHAGY_IN_R	0.0383332	0.0968755	0.154755	0.00121255
SLC16A3-GOBP_PARKIN_MEDIATED_STIMULATION_OF_MITOPHAGY_IN_R	-0.110055	-0.0516287	0.00715361	0.0851365
ANGPTL4-GOBP_PARKIN_MEDIATED_STIMULATION_OF_MITOPHAGY_IN_R	-0.0588939	-0.00013378	0.0586273	0.996443
GAPDHS-GOBP_PARKIN_MEDIATED_STIMULATION_OF_MITOPHAGY_IN_R	-0.0479354	0.0108558	0.069572	0.717523
ACSS2-GOBP_PARKIN_MEDIATED_STIMULATION_OF_MITOPHAGY_IN_R	-0.162388	-0.104626	-0.046149	0.000471991
SPAG4-GOBP_PARKIN_MEDIATED_STIMULATION_OF_MITOPHAGY_IN_R	-0.00260272	0.0561664	0.114549	0.0610437
AURKA-GOBP_PARKIN_MEDIATED_STIMULATION_OF_MITOPHAGY_IN_R	-0.08912	-0.0305193	0.028292	0.309026
PCK1-GOBP_PARKIN_MEDIATED_STIMULATION_OF_MITOPHAGY_IN_R	-0.112017	-0.0536091	0.00516776	0.0738141
TFF3-GOBP_PARKIN_MEDIATED_STIMULATION_OF_MITOPHAGY_IN_R	-0.0653766	-0.00664157	0.0521393	0.824838
GAL3ST1-GOBP_PARKIN_MEDIATED_STIMULATION_OF_MITOPHAGY_IN_R	-0.0926314	-0.0340562	0.0247539	0.256282
KDELR3-GOBP_PARKIN_MEDIATED_STIMULATION_OF_MITOPHAGY_IN_R	-0.132519	-0.0743369	-0.0156446	0.0131144
BIK-GOBP_PARKIN_MEDIATED_STIMULATION_OF_MITOPHAGY_IN_R	-0.0916651	-0.0330827	0.0257279	0.270133
MIOX-GOBP_PARKIN_MEDIATED_STIMULATION_OF_MITOPHAGY_IN_R	-0.0370897	0.0217183	0.0803762	0.469171
PFKFB1-GOBP_PARKIN_MEDIATED_STIMULATION_OF_MITOPHAGY_IN_R	-0.0873605	-0.0287475	0.0300638	0.33797
GPC4-GOBP_PARKIN_MEDIATED_STIMULATION_OF_MITOPHAGY_IN_R	-0.159057	-0.101242	-0.0427361	0.000718255
GPC3-GOBP_PARKIN_MEDIATED_STIMULATION_OF_MITOPHAGY_IN_R	-0.121133	-0.0628194	-0.00407385	0.0361289
TKTL1-GOBP_PARKIN_MEDIATED_STIMULATION_OF_MITOPHAGY_IN_R	-0.0714083	-0.012701	0.0460939	0.672099
GALE-GOBP_POSITIVE_REGULATION_OF_MITOPHAGY	-0.0305707	0.0282406	0.086857	0.34656
STMN1-GOBP_POSITIVE_REGULATION_OF_MITOPHAGY	-0.0342732	0.0245368	0.0831774	0.413477
SLC2A1-GOBP_POSITIVE_REGULATION_OF_MITOPHAGY	-0.0959708	-0.0374212	0.0213864	0.212226
ARTN-GOBP_POSITIVE_REGULATION_OF_MITOPHAGY	-0.0478963	0.010895	0.069611	0.716548
PGM1-GOBP_POSITIVE_REGULATION_OF_MITOPHAGY	-0.170436	-0.112805	-0.0544053	0.000162476
AK4-GOBP_POSITIVE_REGULATION_OF_MITOPHAGY	-0.0867674	-0.0281504	0.0306609	0.348104
DEPDC1-GOBP_POSITIVE_REGULATION_OF_MITOPHAGY	-0.0394711	0.0193343	0.0780063	0.519342
EFNA3-GOBP_POSITIVE_REGULATION_OF_MITOPHAGY	-0.0522731	0.00650743	0.0652431	0.82832
LHX9-GOBP_POSITIVE_REGULATION_OF_MITOPHAGY	-0.074351	-0.0156589	0.0431414	0.601774
PPFIA4-GOBP_POSITIVE_REGULATION_OF_MITOPHAGY	-0.0563503	0.00241828	0.0611702	0.93577
SDC1-GOBP_POSITIVE_REGULATION_OF_MITOPHAGY	-0.162445	-0.104684	-0.0462074	0.000468563
CENPA-GOBP_POSITIVE_REGULATION_OF_MITOPHAGY	-0.036801	0.0220072	0.0806635	0.463277
UGP2-GOBP_POSITIVE_REGULATION_OF_MITOPHAGY	-0.189785	-0.132502	-0.0743206	9.20279e-06
LCT-GOBP_POSITIVE_REGULATION_OF_MITOPHAGY	-0.0581486	0.000614064	0.0593725	0.983674
CXCR4-GOBP_POSITIVE_REGULATION_OF_MITOPHAGY	-0.17702	-0.119503	-0.0611719	6.42412e-05
CHPF-GOBP_POSITIVE_REGULATION_OF_MITOPHAGY	-0.172177	-0.114575	-0.0561931	0.000127754
NUP210-GOBP_POSITIVE_REGULATION_OF_MITOPHAGY	-0.122827	-0.0645325	-0.00579388	0.0313395
PFKFB4-GOBP_POSITIVE_REGULATION_OF_MITOPHAGY	-0.0836348	-0.0249971	0.0338131	0.404767
ADH4-GOBP_POSITIVE_REGULATION_OF_MITOPHAGY	-0.0995284	-0.0410077	0.0177958	0.171587
ADH6-GOBP_POSITIVE_REGULATION_OF_MITOPHAGY	-0.0971557	-0.0386156	0.0201908	0.197985
ADH1A-GOBP_POSITIVE_REGULATION_OF_MITOPHAGY	-0.101552	-0.0430483	0.0157521	0.151226
ADH1B-GOBP_POSITIVE_REGULATION_OF_MITOPHAGY	-0.15237	-0.0944554	-0.035894	0.00160662
ADH1C-GOBP_POSITIVE_REGULATION_OF_MITOPHAGY	-0.146358	-0.0883572	-0.0297511	0.00317567
SAP30-GOBP_POSITIVE_REGULATION_OF_MITOPHAGY	-0.064406	-0.0056669	0.0531114	0.850213
VCAN-GOBP_POSITIVE_REGULATION_OF_MITOPHAGY	-0.16633	-0.108631	-0.0501907	0.000282564
KIF20A-GOBP_POSITIVE_REGULATION_OF_MITOPHAGY	-0.0209031	0.037904	0.0964497	0.206383
HMMR-GOBP_POSITIVE_REGULATION_OF_MITOPHAGY	-0.0442574	0.014541	0.073239	0.627965
IER3-GOBP_POSITIVE_REGULATION_OF_MITOPHAGY	-0.101324	-0.042818	0.0159827	0.153427
PGK2-GOBP_POSITIVE_REGULATION_OF_MITOPHAGY	-0.0132337	0.0455623	0.104044	0.128734
ME1-GOBP_POSITIVE_REGULATION_OF_MITOPHAGY	-0.0721799	-0.0134765	0.04532	0.65335
NT5E-GOBP_POSITIVE_REGULATION_OF_MITOPHAGY	-0.187579	-0.130254	-0.0720448	1.30546e-05
RRAGD-GOBP_POSITIVE_REGULATION_OF_MITOPHAGY	-0.137005	-0.0788792	-0.0202124	0.00847122
EGFR-GOBP_POSITIVE_REGULATION_OF_MITOPHAGY	-0.180476	-0.12302	-0.0647272	3.86887e-05
CLDN3-GOBP_POSITIVE_REGULATION_OF_MITOPHAGY	-0.0931863	-0.0346153	0.0241945	0.248552
MET-GOBP_POSITIVE_REGULATION_OF_MITOPHAGY	-0.157207	-0.0993641	-0.040842	0.000901969
GFUS-GOBP_POSITIVE_REGULATION_OF_MITOPHAGY	-0.114282	-0.0558971	0.00287295	0.0622964
VLDLR-GOBP_POSITIVE_REGULATION_OF_MITOPHAGY	-0.17472	-0.117163	-0.0588069	8.93439e-05
FBP1-GOBP_POSITIVE_REGULATION_OF_MITOPHAGY	-0.0946451	-0.0360852	0.0227235	0.229014
COL5A1-GOBP_POSITIVE_REGULATION_OF_MITOPHAGY	-0.172898	-0.115309	-0.0569343	0.000115518
PFKFB3-GOBP_POSITIVE_REGULATION_OF_MITOPHAGY	-0.156662	-0.0988107	-0.0402841	0.000963868
CDK1-GOBP_POSITIVE_REGULATION_OF_MITOPHAGY	-0.0103053	0.0484846	0.106941	0.105952
P4HA1-GOBP_POSITIVE_REGULATION_OF_MITOPHAGY	-0.0969042	-0.038362	0.0204446	0.200949
LDHC-GOBP_POSITIVE_REGULATION_OF_MITOPHAGY	-0.0575045	0.00126034	0.0600165	0.966499
CHST1-GOBP_POSITIVE_REGULATION_OF_MITOPHAGY	-0.0627655	-0.00401976	0.0547537	0.893438
PC-GOBP_POSITIVE_REGULATION_OF_MITOPHAGY	-0.0909074	-0.0323195	0.0264914	0.281346
PPP2R1B-GOBP_POSITIVE_REGULATION_OF_MITOPHAGY	-0.154228	-0.0963405	-0.0377939	0.00129108
B3GAT1-GOBP_POSITIVE_REGULATION_OF_MITOPHAGY	-0.107175	-0.0487208	0.0100686	0.10426
FKBP4-GOBP_POSITIVE_REGULATION_OF_MITOPHAGY	-0.0728079	-0.0141077	0.0446899	0.638247
GAPDH-GOBP_POSITIVE_REGULATION_OF_MITOPHAGY	-0.109646	-0.0512152	0.0075681	0.0876686
ENO2-GOBP_POSITIVE_REGULATION_OF_MITOPHAGY	-0.0237864	0.0350231	0.0935911	0.243019
GYS2-GOBP_POSITIVE_REGULATION_OF_MITOPHAGY	-0.0956559	-0.0371039	0.021704	0.216131
DCN-GOBP_POSITIVE_REGULATION_OF_MITOPHAGY	-0.200779	-0.143714	-0.0856774	1.4781e-06
ALDH2-GOBP_POSITIVE_REGULATION_OF_MITOPHAGY	-0.181358	-0.123917	-0.0656348	3.3917e-05
IRS2-GOBP_POSITIVE_REGULATION_OF_MITOPHAGY	-0.130553	-0.0723471	-0.0136445	0.0157754
EGLN3-GOBP_POSITIVE_REGULATION_OF_MITOPHAGY	-0.0920138	-0.033434	0.0253764	0.265076
PYGL-GOBP_POSITIVE_REGULATION_OF_MITOPHAGY	-0.105657	-0.0471897	0.0116031	0.115619
FUT8-GOBP_POSITIVE_REGULATION_OF_MITOPHAGY	-0.112968	-0.0545696	0.00420446	0.068783
ISG20-GOBP_POSITIVE_REGULATION_OF_MITOPHAGY	-0.117089	-0.058732	2.86402e-05	0.050126
ALDH1A3-GOBP_POSITIVE_REGULATION_OF_MITOPHAGY	-0.188272	-0.13096	-0.0727591	1.17048e-05
POLR3K-GOBP_POSITIVE_REGULATION_OF_MITOPHAGY	-0.0613186	-0.00256731	0.0562017	0.931821
CACNA1H-GOBP_POSITIVE_REGULATION_OF_MITOPHAGY	-0.0172176	0.0415851	0.100101	0.165628
PGP-GOBP_POSITIVE_REGULATION_OF_MITOPHAGY	-0.0481541	0.0106366	0.0693538	0.72299
CLDN9-GOBP_POSITIVE_REGULATION_OF_MITOPHAGY	-0.0821994	-0.0235526	0.0352567	0.432465
ALDOA-GOBP_POSITIVE_REGULATION_OF_MITOPHAGY	-0.0833283	-0.0246886	0.0341214	0.410591
CHST6-GOBP_POSITIVE_REGULATION_OF_MITOPHAGY	-0.145707	-0.0876968	-0.0290861	0.00341077
SLC2A4-GOBP_POSITIVE_REGULATION_OF_MITOPHAGY	-0.146356	-0.0883551	-0.029749	0.00317639
ALDH3A1-GOBP_POSITIVE_REGULATION_OF_MITOPHAGY	-0.0759352	-0.0172516	0.041551	0.565332
ALDOC-GOBP_POSITIVE_REGULATION_OF_MITOPHAGY	-0.135435	-0.0772894	-0.0186133	0.00989539
SLC4A1-GOBP_POSITIVE_REGULATION_OF_MITOPHAGY	-0.0663702	-0.00763946	0.0511441	0.799046
SLC25A10-GOBP_POSITIVE_REGULATION_OF_MITOPHAGY	-0.0125451	0.0462496	0.104726	0.12306
SLC16A3-GOBP_POSITIVE_REGULATION_OF_MITOPHAGY	-0.0961347	-0.0375865	0.021221	0.210213
ANGPTL4-GOBP_POSITIVE_REGULATION_OF_MITOPHAGY	-0.130496	-0.0722903	-0.0135874	0.0158579
GAPDHS-GOBP_POSITIVE_REGULATION_OF_MITOPHAGY	-0.0371946	0.0216132	0.0802719	0.471324
ACSS2-GOBP_POSITIVE_REGULATION_OF_MITOPHAGY	-0.152173	-0.0942548	-0.0356919	0.00164406
SPAG4-GOBP_POSITIVE_REGULATION_OF_MITOPHAGY	-0.00849515	0.0502905	0.10873	0.093552
AURKA-GOBP_POSITIVE_REGULATION_OF_MITOPHAGY	-0.0280801	0.0307312	0.0893304	0.305678
PCK1-GOBP_POSITIVE_REGULATION_OF_MITOPHAGY	-0.140775	-0.0826985	-0.0240549	0.00576972
TFF3-GOBP_POSITIVE_REGULATION_OF_MITOPHAGY	-0.0434871	0.0153126	0.0740066	0.609834
GAL3ST1-GOBP_POSITIVE_REGULATION_OF_MITOPHAGY	-0.131654	-0.0734617	-0.0147649	0.0142316
KDELR3-GOBP_POSITIVE_REGULATION_OF_MITOPHAGY	-0.134838	-0.076685	-0.0180056	0.0104903
BIK-GOBP_POSITIVE_REGULATION_OF_MITOPHAGY	-0.0477067	0.0110849	0.0698	0.711824
MIOX-GOBP_POSITIVE_REGULATION_OF_MITOPHAGY	-0.09385	-0.035284	0.0235254	0.239525
PFKFB1-GOBP_POSITIVE_REGULATION_OF_MITOPHAGY	-0.0869519	-0.0283361	0.0304752	0.344931
GPC4-GOBP_POSITIVE_REGULATION_OF_MITOPHAGY	-0.133588	-0.0754198	-0.0167334	0.0118396
GPC3-GOBP_POSITIVE_REGULATION_OF_MITOPHAGY	-0.130904	-0.0727027	-0.0140019	0.0152677
TKTL1-GOBP_POSITIVE_REGULATION_OF_MITOPHAGY	-0.101153	-0.0426458	0.0161552	0.155089
GALE-GOBP_POSITIVE_REGULATION_OF_MITOPHAGY_IN_RESPONSE_	-0.0738337	-0.0151388	0.0436606	0.613898
STMN1-GOBP_POSITIVE_REGULATION_OF_MITOPHAGY_IN_RESPONSE_	-0.0860388	-0.0274169	0.0313943	0.360813
SLC2A1-GOBP_POSITIVE_REGULATION_OF_MITOPHAGY_IN_RESPONSE_	-0.158393	-0.100569	-0.0420567	0.000779729
ARTN-GOBP_POSITIVE_REGULATION_OF_MITOPHAGY_IN_RESPONSE_	-0.0572307	0.00153501	0.0602901	0.959204
PGM1-GOBP_POSITIVE_REGULATION_OF_MITOPHAGY_IN_RESPONSE_	-0.231554	-0.175177	-0.117627	4.02464e-09
AK4-GOBP_POSITIVE_REGULATION_OF_MITOPHAGY_IN_RESPONSE_	-0.0969832	-0.0384417	0.0203649	0.200014
DEPDC1-GOBP_POSITIVE_REGULATION_OF_MITOPHAGY_IN_RESPONSE_	-0.0998958	-0.0413781	0.0174248	0.167746
EFNA3-GOBP_POSITIVE_REGULATION_OF_MITOPHAGY_IN_RESPONSE_	0.0133638	0.0720677	0.130277	0.0161846
LHX9-GOBP_POSITIVE_REGULATION_OF_MITOPHAGY_IN_RESPONSE_	-0.0621323	-0.0033841	0.0553875	0.910211
PPFIA4-GOBP_POSITIVE_REGULATION_OF_MITOPHAGY_IN_RESPONSE_	-0.135864	-0.0777235	-0.0190499	0.00948677
SDC1-GOBP_POSITIVE_REGULATION_OF_MITOPHAGY_IN_RESPONSE_	-0.153395	-0.0954949	-0.0369416	0.0014248
CENPA-GOBP_POSITIVE_REGULATION_OF_MITOPHAGY_IN_RESPONSE_	-0.0674325	-0.00870642	0.0500798	0.771709
UGP2-GOBP_POSITIVE_REGULATION_OF_MITOPHAGY_IN_RESPONSE_	-0.229994	-0.17358	-0.116002	5.58607e-09
LCT-GOBP_POSITIVE_REGULATION_OF_MITOPHAGY_IN_RESPONSE_	-0.0135203	0.0452763	0.103761	0.131154
CXCR4-GOBP_POSITIVE_REGULATION_OF_MITOPHAGY_IN_RESPONSE_	-0.187851	-0.130531	-0.0723251	1.25082e-05
CHPF-GOBP_POSITIVE_REGULATION_OF_MITOPHAGY_IN_RESPONSE_	-0.217798	-0.161099	-0.103317	6.52337e-08
NUP210-GOBP_POSITIVE_REGULATION_OF_MITOPHAGY_IN_RESPONSE_	-0.264916	-0.209416	-0.152532	1.70146e-12
PFKFB4-GOBP_POSITIVE_REGULATION_OF_MITOPHAGY_IN_RESPONSE_	-0.184573	-0.127192	-0.0689469	2.08237e-05
ADH4-GOBP_POSITIVE_REGULATION_OF_MITOPHAGY_IN_RESPONSE_	-0.0267986	0.0320124	0.0906025	0.285945
ADH6-GOBP_POSITIVE_REGULATION_OF_MITOPHAGY_IN_RESPONSE_	-0.0397248	0.0190803	0.0777537	0.524846
ADH1A-GOBP_POSITIVE_REGULATION_OF_MITOPHAGY_IN_RESPONSE_	-0.0347112	0.0240985	0.0827419	0.421871
ADH1B-GOBP_POSITIVE_REGULATION_OF_MITOPHAGY_IN_RESPONSE_	-0.104092	-0.0456102	0.0131857	0.128332
ADH1C-GOBP_POSITIVE_REGULATION_OF_MITOPHAGY_IN_RESPONSE_	-0.102388	-0.0438916	0.0149074	0.14337
SAP30-GOBP_POSITIVE_REGULATION_OF_MITOPHAGY_IN_RESPONSE_	-0.15424	-0.0963528	-0.0378063	0.00128922
VCAN-GOBP_POSITIVE_REGULATION_OF_MITOPHAGY_IN_RESPONSE_	-0.230094	-0.173681	-0.116106	5.47116e-09
KIF20A-GOBP_POSITIVE_REGULATION_OF_MITOPHAGY_IN_RESPONSE_	-0.089233	-0.0306331	0.0281782	0.307225
HMMR-GOBP_POSITIVE_REGULATION_OF_MITOPHAGY_IN_RESPONSE_	-0.163488	-0.105743	-0.047276	0.000409784
IER3-GOBP_POSITIVE_REGULATION_OF_MITOPHAGY_IN_RESPONSE_	-0.189094	-0.131798	-0.0736071	1.0275e-05
PGK2-GOBP_POSITIVE_REGULATION_OF_MITOPHAGY_IN_RESPONSE_	-0.0177569	0.0410465	0.0995669	0.171182
ME1-GOBP_POSITIVE_REGULATION_OF_MITOPHAGY_IN_RESPONSE_	-0.0998119	-0.0412935	0.0175095	0.168618
NT5E-GOBP_POSITIVE_REGULATION_OF_MITOPHAGY_IN_RESPONSE_	-0.240714	-0.184564	-0.127183	5.51092e-10
RRAGD-GOBP_POSITIVE_REGULATION_OF_MITOPHAGY_IN_RESPONSE_	-0.146224	-0.0882215	-0.0296144	0.00322274
EGFR-GOBP_POSITIVE_REGULATION_OF_MITOPHAGY_IN_RESPONSE_	-0.163213	-0.105463	-0.0469941	0.000424581
CLDN3-GOBP_POSITIVE_REGULATION_OF_MITOPHAGY_IN_RESPONSE_	-0.113522	-0.0551295	0.00364286	0.0659824
MET-GOBP_POSITIVE_REGULATION_OF_MITOPHAGY_IN_RESPONSE_	-0.154257	-0.0963704	-0.037824	0.00128657
GFUS-GOBP_POSITIVE_REGULATION_OF_MITOPHAGY_IN_RESPONSE_	-0.109848	-0.0514193	0.00736351	0.0864112
VLDLR-GOBP_POSITIVE_REGULATION_OF_MITOPHAGY_IN_RESPONSE_	-0.177386	-0.119875	-0.0615477	6.09268e-05
FBP1-GOBP_POSITIVE_REGULATION_OF_MITOPHAGY_IN_RESPONSE_	-0.192342	-0.135109	-0.076959	6.09304e-06
COL5A1-GOBP_POSITIVE_REGULATION_OF_MITOPHAGY_IN_RESPONSE_	-0.222583	-0.165994	-0.10829	2.54311e-08
PFKFB3-GOBP_POSITIVE_REGULATION_OF_MITOPHAGY_IN_RESPONSE_	-0.26386	-0.208329	-0.151422	2.22582e-12
CDK1-GOBP_POSITIVE_REGULATION_OF_MITOPHAGY_IN_RESPONSE_	-0.0797224	-0.0210605	0.0377468	0.482741
P4HA1-GOBP_POSITIVE_REGULATION_OF_MITOPHAGY_IN_RESPONSE_	-0.151342	-0.0934125	-0.0348432	0.00181025
LDHC-GOBP_POSITIVE_REGULATION_OF_MITOPHAGY_IN_RESPONSE_	-0.107981	-0.0495352	0.00925228	0.0985888
CHST1-GOBP_POSITIVE_REGULATION_OF_MITOPHAGY_IN_RESPONSE_	-0.162675	-0.104917	-0.0464428	0.000454976
PC-GOBP_POSITIVE_REGULATION_OF_MITOPHAGY_IN_RESPONSE_	-0.214572	-0.157801	-0.0999677	1.21128e-07
PPP2R1B-GOBP_POSITIVE_REGULATION_OF_MITOPHAGY_IN_RESPONSE_	-0.237219	-0.180981	-0.123535	1.19183e-09
B3GAT1-GOBP_POSITIVE_REGULATION_OF_MITOPHAGY_IN_RESPONSE_	-0.0690638	-0.0103452	0.0484448	0.730278
FKBP4-GOBP_POSITIVE_REGULATION_OF_MITOPHAGY_IN_RESPONSE_	-0.223043	-0.166464	-0.108768	2.31959e-08
GAPDH-GOBP_POSITIVE_REGULATION_OF_MITOPHAGY_IN_RESPONSE_	-0.140127	-0.0820423	-0.0233945	0.00616995
ENO2-GOBP_POSITIVE_REGULATION_OF_MITOPHAGY_IN_RESPONSE_	-0.171146	-0.113527	-0.055134	0.000147369
GYS2-GOBP_POSITIVE_REGULATION_OF_MITOPHAGY_IN_RESPONSE_	-0.057852	0.000911672	0.059669	0.975763
DCN-GOBP_POSITIVE_REGULATION_OF_MITOPHAGY_IN_RESPONSE_	-0.234161	-0.177848	-0.120345	2.31058e-09
ALDH2-GOBP_POSITIVE_REGULATION_OF_MITOPHAGY_IN_RESPONSE_	-0.139859	-0.0817709	-0.0231214	0.00634268
IRS2-GOBP_POSITIVE_REGULATION_OF_MITOPHAGY_IN_RESPONSE_	-0.254261	-0.198466	-0.141354	2.38512e-11
EGLN3-GOBP_POSITIVE_REGULATION_OF_MITOPHAGY_IN_RESPONSE_	-0.0698375	-0.0111226	0.0476691	0.710889
PYGL-GOBP_POSITIVE_REGULATION_OF_MITOPHAGY_IN_RESPONSE_	-0.140939	-0.0828647	-0.0242221	0.00567215
FUT8-GOBP_POSITIVE_REGULATION_OF_MITOPHAGY_IN_RESPONSE_	-0.211966	-0.155138	-0.0972642	1.97824e-07
ISG20-GOBP_POSITIVE_REGULATION_OF_MITOPHAGY_IN_RESPONSE_	-0.0967201	-0.0381765	0.0206304	0.203137
ALDH1A3-GOBP_POSITIVE_REGULATION_OF_MITOPHAGY_IN_RESPONSE_	-0.103648	-0.0451628	0.0136339	0.132123
POLR3K-GOBP_POSITIVE_REGULATION_OF_MITOPHAGY_IN_RESPONSE_	-0.168422	-0.110757	-0.0523375	0.000213657
CACNA1H-GOBP_POSITIVE_REGULATION_OF_MITOPHAGY_IN_RESPONSE_	-0.146654	-0.0886571	-0.0300531	0.00307386
PGP-GOBP_POSITIVE_REGULATION_OF_MITOPHAGY_IN_RESPONSE_	-0.0854706	-0.0268449	0.0319661	0.370923
CLDN9-GOBP_POSITIVE_REGULATION_OF_MITOPHAGY_IN_RESPONSE_	-0.00566659	0.0531117	0.111524	0.0765354
ALDOA-GOBP_POSITIVE_REGULATION_OF_MITOPHAGY_IN_RESPONSE_	-0.152467	-0.0945538	-0.0359932	0.00158854
CHST6-GOBP_POSITIVE_REGULATION_OF_MITOPHAGY_IN_RESPONSE_	-0.151516	-0.0935882	-0.0350202	0.00177437
SLC2A4-GOBP_POSITIVE_REGULATION_OF_MITOPHAGY_IN_RESPONSE_	-0.113067	-0.0546694	0.00410436	0.0682768
ALDH3A1-GOBP_POSITIVE_REGULATION_OF_MITOPHAGY_IN_RESPONSE_	-0.107084	-0.0486289	0.0101607	0.104915
ALDOC-GOBP_POSITIVE_REGULATION_OF_MITOPHAGY_IN_RESPONSE_	-0.120548	-0.0622278	-0.00347995	0.0379216
SLC4A1-GOBP_POSITIVE_REGULATION_OF_MITOPHAGY_IN_RESPONSE_	-0.125704	-0.0674418	-0.00871573	0.0244488
SLC25A10-GOBP_POSITIVE_REGULATION_OF_MITOPHAGY_IN_RESPONSE_	-0.00807464	0.05071	0.109145	0.0908452
SLC16A3-GOBP_POSITIVE_REGULATION_OF_MITOPHAGY_IN_RESPONSE_	-0.131454	-0.0732588	-0.0145609	0.0145023
ANGPTL4-GOBP_POSITIVE_REGULATION_OF_MITOPHAGY_IN_RESPONSE_	-0.0969092	-0.0383671	0.0204395	0.200889
GAPDHS-GOBP_POSITIVE_REGULATION_OF_MITOPHAGY_IN_RESPONSE_	0.0199383	0.0786068	0.136736	0.00870145
ACSS2-GOBP_POSITIVE_REGULATION_OF_MITOPHAGY_IN_RESPONSE_	-0.199741	-0.142655	-0.0846032	1.7678e-06
SPAG4-GOBP_POSITIVE_REGULATION_OF_MITOPHAGY_IN_RESPONSE_	-0.00545189	0.0533258	0.111736	0.0753542
AURKA-GOBP_POSITIVE_REGULATION_OF_MITOPHAGY_IN_RESPONSE_	-0.0788603	-0.0201933	0.0386131	0.500952
PCK1-GOBP_POSITIVE_REGULATION_OF_MITOPHAGY_IN_RESPONSE_	-0.112769	-0.0543682	0.00440642	0.0698138
TFF3-GOBP_POSITIVE_REGULATION_OF_MITOPHAGY_IN_RESPONSE_	-0.107336	-0.0488837	0.0099053	0.103105
GAL3ST1-GOBP_POSITIVE_REGULATION_OF_MITOPHAGY_IN_RESPONSE_	-0.106648	-0.0481898	0.0106008	0.108094
KDELR3-GOBP_POSITIVE_REGULATION_OF_MITOPHAGY_IN_RESPONSE_	-0.136587	-0.0784559	-0.0197865	0.00883136
BIK-GOBP_POSITIVE_REGULATION_OF_MITOPHAGY_IN_RESPONSE_	-0.108431	-0.0499893	0.00879713	0.0955356
MIOX-GOBP_POSITIVE_REGULATION_OF_MITOPHAGY_IN_RESPONSE_	-0.0527064	0.00607295	0.0648104	0.839621
PFKFB1-GOBP_POSITIVE_REGULATION_OF_MITOPHAGY_IN_RESPONSE_	-0.0571044	0.00166171	0.0604164	0.95584
GPC4-GOBP_POSITIVE_REGULATION_OF_MITOPHAGY_IN_RESPONSE_	-0.198777	-0.141671	-0.0836067	2.08476e-06
GPC3-GOBP_POSITIVE_REGULATION_OF_MITOPHAGY_IN_RESPONSE_	-0.150256	-0.0923106	-0.033733	0.00205093
TKTL1-GOBP_POSITIVE_REGULATION_OF_MITOPHAGY_IN_RESPONSE_	-0.0770151	-0.0183375	0.0404667	0.541111
GALE-GOBP_REGULATION_OF_MITOPHAGY	-0.0633937	-0.00465044	0.0541249	0.876843
STMN1-GOBP_REGULATION_OF_MITOPHAGY	-0.0283001	0.0305112	0.089112	0.309155
SLC2A1-GOBP_REGULATION_OF_MITOPHAGY	-0.179816	-0.122348	-0.0640483	4.26666e-05
ARTN-GOBP_REGULATION_OF_MITOPHAGY	-0.030795	0.0280163	0.0866342	0.350406
PGM1-GOBP_REGULATION_OF_MITOPHAGY	-0.221648	-0.165037	-0.107317	3.06408e-08
AK4-GOBP_REGULATION_OF_MITOPHAGY	-0.159497	-0.101689	-0.0431866	0.000680003
DEPDC1-GOBP_REGULATION_OF_MITOPHAGY	-0.041424	0.0173789	0.0760618	0.562468
EFNA3-GOBP_REGULATION_OF_MITOPHAGY	-0.0269072	0.0319038	0.0904947	0.287584
LHX9-GOBP_REGULATION_OF_MITOPHAGY	-0.0437739	0.0150253	0.0737208	0.616557
PPFIA4-GOBP_REGULATION_OF_MITOPHAGY	-0.132808	-0.0746294	-0.0159387	0.0127587
SDC1-GOBP_REGULATION_OF_MITOPHAGY	-0.180682	-0.12323	-0.0649394	3.75191e-05
CENPA-GOBP_REGULATION_OF_MITOPHAGY	0.0075577	0.0662888	0.124564	0.0270045
UGP2-GOBP_REGULATION_OF_MITOPHAGY	-0.213123	-0.15632	-0.0984643	1.59274e-07
LCT-GOBP_REGULATION_OF_MITOPHAGY	-0.0251935	0.0336168	0.0921953	0.262471
CXCR4-GOBP_REGULATION_OF_MITOPHAGY	-0.20083	-0.143766	-0.0857296	1.46525e-06
CHPF-GOBP_REGULATION_OF_MITOPHAGY	-0.239109	-0.182918	-0.125507	7.86966e-10
NUP210-GOBP_REGULATION_OF_MITOPHAGY	-0.170579	-0.112951	-0.0545523	0.000159314
PFKFB4-GOBP_REGULATION_OF_MITOPHAGY	-0.169294	-0.111644	-0.0532324	0.000189885
ADH4-GOBP_REGULATION_OF_MITOPHAGY	-0.115894	-0.0575251	0.00123962	0.0550393
ADH6-GOBP_REGULATION_OF_MITOPHAGY	-0.077519	-0.0188443	0.0399605	0.529987
ADH1A-GOBP_REGULATION_OF_MITOPHAGY	-0.141852	-0.08379	-0.0251533	0.00515554
ADH1B-GOBP_REGULATION_OF_MITOPHAGY	-0.199563	-0.142473	-0.0844196	1.82249e-06
ADH1C-GOBP_REGULATION_OF_MITOPHAGY	-0.182391	-0.12497	-0.0666991	2.90335e-05
SAP30-GOBP_REGULATION_OF_MITOPHAGY	-0.117514	-0.0591622	-0.000403073	0.0484658
VCAN-GOBP_REGULATION_OF_MITOPHAGY	-0.265683	-0.210204	-0.153337	1.39886e-12
KIF20A-GOBP_REGULATION_OF_MITOPHAGY	-0.0303209	0.0284905	0.0871052	0.342309
HMMR-GOBP_REGULATION_OF_MITOPHAGY	-0.0729107	-0.014211	0.0445868	0.635789
IER3-GOBP_REGULATION_OF_MITOPHAGY	-0.200533	-0.143463	-0.085423	1.54228e-06
PGK2-GOBP_REGULATION_OF_MITOPHAGY	-0.00926722	0.0495203	0.107967	0.0986903
ME1-GOBP_REGULATION_OF_MITOPHAGY	-0.0815511	-0.0229003	0.0359086	0.445325
NT5E-GOBP_REGULATION_OF_MITOPHAGY	-0.279626	-0.224555	-0.168011	3.45274e-14
RRAGD-GOBP_REGULATION_OF_MITOPHAGY	-0.141637	-0.0835721	-0.024934	0.00527322
EGFR-GOBP_REGULATION_OF_MITOPHAGY	-0.193057	-0.135837	-0.0776969	5.42197e-06
CLDN3-GOBP_REGULATION_OF_MITOPHAGY	-0.0853242	-0.0266975	0.0321135	0.373558
MET-GOBP_REGULATION_OF_MITOPHAGY	-0.174198	-0.116631	-0.0582702	9.62076e-05
GFUS-GOBP_REGULATION_OF_MITOPHAGY	-0.106291	-0.0478291	0.0109623	0.110762
VLDLR-GOBP_REGULATION_OF_MITOPHAGY	-0.16975	-0.112108	-0.0537012	0.000178444
FBP1-GOBP_REGULATION_OF_MITOPHAGY	-0.211005	-0.154156	-0.0962673	2.36564e-07
COL5A1-GOBP_REGULATION_OF_MITOPHAGY	-0.282496	-0.227512	-0.171038	1.55861e-14
PFKFB3-GOBP_REGULATION_OF_MITOPHAGY	-0.245223	-0.189188	-0.131894	1.99049e-10
CDK1-GOBP_REGULATION_OF_MITOPHAGY	-0.0206932	0.0381137	0.0966578	0.203882
P4HA1-GOBP_REGULATION_OF_MITOPHAGY	-0.195416	-0.138243	-0.080133	3.67321e-06
LDHC-GOBP_REGULATION_OF_MITOPHAGY	-0.0668625	-0.00813386	0.0506509	0.786346
CHST1-GOBP_REGULATION_OF_MITOPHAGY	-0.146993	-0.089001	-0.0303994	0.00296075
PC-GOBP_REGULATION_OF_MITOPHAGY	-0.156475	-0.0986214	-0.0400932	0.000985929
PPP2R1B-GOBP_REGULATION_OF_MITOPHAGY	-0.182671	-0.125255	-0.0669871	2.78316e-05
B3GAT1-GOBP_REGULATION_OF_MITOPHAGY	-0.0963678	-0.0378214	0.0209858	0.207374
FKBP4-GOBP_REGULATION_OF_MITOPHAGY	-0.152932	-0.0950252	-0.0364683	0.00150446
GAPDH-GOBP_REGULATION_OF_MITOPHAGY	-0.105526	-0.0470577	0.0117353	0.116641
ENO2-GOBP_REGULATION_OF_MITOPHAGY	-0.129944	-0.0717309	-0.0130253	0.0166904
GYS2-GOBP_REGULATION_OF_MITOPHAGY	-0.0750574	-0.016369	0.0424324	0.585396
DCN-GOBP_REGULATION_OF_MITOPHAGY	-0.321128	-0.267413	-0.211984	1.11467e-19
ALDH2-GOBP_REGULATION_OF_MITOPHAGY	-0.219425	-0.162763	-0.105007	4.75077e-08
IRS2-GOBP_REGULATION_OF_MITOPHAGY	-0.191798	-0.134554	-0.0763977	6.65585e-06
EGLN3-GOBP_REGULATION_OF_MITOPHAGY	-0.146344	-0.0883432	-0.029737	0.00318051
PYGL-GOBP_REGULATION_OF_MITOPHAGY	-0.207617	-0.150695	-0.092756	4.40282e-07
FUT8-GOBP_REGULATION_OF_MITOPHAGY	-0.230992	-0.174601	-0.117042	4.53087e-09
ISG20-GOBP_REGULATION_OF_MITOPHAGY	-0.0851394	-0.0265114	0.0322995	0.376898
ALDH1A3-GOBP_REGULATION_OF_MITOPHAGY	-0.158261	-0.100434	-0.0419209	0.000792588
POLR3K-GOBP_REGULATION_OF_MITOPHAGY	-0.109428	-0.0509951	0.00778885	0.0890418
CACNA1H-GOBP_REGULATION_OF_MITOPHAGY	-0.109352	-0.0509183	0.00786585	0.0895248
PGP-GOBP_REGULATION_OF_MITOPHAGY	-0.0333912	0.0254192	0.0840542	0.396877
CLDN9-GOBP_REGULATION_OF_MITOPHAGY	-0.010978	0.0478134	0.106275	0.110879
ALDOA-GOBP_REGULATION_OF_MITOPHAGY	-0.20481	-0.147828	-0.0898481	7.28939e-07
CHST6-GOBP_REGULATION_OF_MITOPHAGY	-0.159561	-0.101755	-0.0432528	0.000674552
SLC2A4-GOBP_REGULATION_OF_MITOPHAGY	-0.210308	-0.153444	-0.095545	2.69109e-07
ALDH3A1-GOBP_REGULATION_OF_MITOPHAGY	-0.0660104	-0.00727806	0.0515045	0.808363
ALDOC-GOBP_REGULATION_OF_MITOPHAGY	-0.160401	-0.102608	-0.0441133	0.000607206
SLC4A1-GOBP_REGULATION_OF_MITOPHAGY	-0.105246	-0.046775	0.0120186	0.118857
SLC25A10-GOBP_REGULATION_OF_MITOPHAGY	0.0159883	0.0746787	0.132856	0.0126995
SLC16A3-GOBP_REGULATION_OF_MITOPHAGY	-0.137143	-0.0790195	-0.0203534	0.00835484
ANGPTL4-GOBP_REGULATION_OF_MITOPHAGY	-0.147515	-0.0895303	-0.0309325	0.00279407
GAPDHS-GOBP_REGULATION_OF_MITOPHAGY	-0.00829071	0.0504945	0.108932	0.092228
ACSS2-GOBP_REGULATION_OF_MITOPHAGY	-0.239766	-0.183593	-0.126193	6.80359e-10
SPAG4-GOBP_REGULATION_OF_MITOPHAGY	0.0118941	0.0706053	0.128831	0.0184827
AURKA-GOBP_REGULATION_OF_MITOPHAGY	-0.0182649	0.0405392	0.0990638	0.176538
PCK1-GOBP_REGULATION_OF_MITOPHAGY	-0.170397	-0.112765	-0.054365	0.000163352
TFF3-GOBP_REGULATION_OF_MITOPHAGY	-0.154207	-0.0963196	-0.0377728	0.00129424
GAL3ST1-GOBP_REGULATION_OF_MITOPHAGY	-0.136429	-0.0782963	-0.019626	0.00897065
KDELR3-GOBP_REGULATION_OF_MITOPHAGY	-0.166736	-0.109043	-0.0506071	0.000267754
BIK-GOBP_REGULATION_OF_MITOPHAGY	-0.127622	-0.0693813	-0.0106642	0.0206204
MIOX-GOBP_REGULATION_OF_MITOPHAGY	-0.0698306	-0.0111156	0.0476761	0.711062
PFKFB1-GOBP_REGULATION_OF_MITOPHAGY	-0.119646	-0.0613163	-0.00256495	0.0408313
GPC4-GOBP_REGULATION_OF_MITOPHAGY	-0.225291	-0.168765	-0.111106	1.47348e-08
GPC3-GOBP_REGULATION_OF_MITOPHAGY	-0.206902	-0.149965	-0.0920152	5.01067e-07
TKTL1-GOBP_REGULATION_OF_MITOPHAGY	-0.0677235	-0.00899877	0.0497881	0.764267
GALE-REACTOME_MITOPHAGY	-0.139283	-0.0811872	-0.0225341	0.00672892
STMN1-REACTOME_MITOPHAGY	-0.094786	-0.0362272	0.0225814	0.227187
SLC2A1-REACTOME_MITOPHAGY	-0.14711	-0.0891193	-0.0305186	0.00292273
ARTN-REACTOME_MITOPHAGY	-0.119045	-0.0607091	-0.0019555	0.0428727
PGM1-REACTOME_MITOPHAGY	-0.285631	-0.230743	-0.174346	6.4541e-15
AK4-REACTOME_MITOPHAGY	-0.174732	-0.117174	-0.0588186	8.91985e-05
DEPDC1-REACTOME_MITOPHAGY	-0.0123415	0.0464527	0.104927	0.121421
EFNA3-REACTOME_MITOPHAGY	-0.0271631	0.031648	0.0902408	0.291467
LHX9-REACTOME_MITOPHAGY	-0.0440627	0.0147361	0.0734331	0.62336
PPFIA4-REACTOME_MITOPHAGY	-0.128096	-0.0698618	-0.011147	0.0197568
SDC1-REACTOME_MITOPHAGY	-0.217217	-0.160506	-0.102714	7.29891e-08
CENPA-REACTOME_MITOPHAGY	0.0507418	0.109177	0.166867	0.000263119
UGP2-REACTOME_MITOPHAGY	-0.301874	-0.247504	-0.191529	5.35858e-17
LCT-REACTOME_MITOPHAGY	0.0341406	0.0927152	0.150655	0.00195933
CXCR4-REACTOME_MITOPHAGY	-0.212071	-0.155245	-0.0973724	1.9401e-07
CHPF-REACTOME_MITOPHAGY	-0.296785	-0.24225	-0.186139	2.50319e-16
NUP210-REACTOME_MITOPHAGY	-0.248862	-0.192922	-0.1357	8.58186e-11
PFKFB4-REACTOME_MITOPHAGY	-0.209974	-0.153103	-0.0951988	2.86201e-07
ADH4-REACTOME_MITOPHAGY	-0.020161	0.0386454	0.0971853	0.197639
ADH6-REACTOME_MITOPHAGY	0.00523805	0.0639789	0.12228	0.0328239
ADH1A-REACTOME_MITOPHAGY	-0.0976594	-0.0391233	0.0196825	0.192148
ADH1B-REACTOME_MITOPHAGY	-0.252201	-0.19635	-0.139196	3.90495e-11
ADH1C-REACTOME_MITOPHAGY	-0.211858	-0.155027	-0.0971516	2.01872e-07
SAP30-REACTOME_MITOPHAGY	-0.191083	-0.133825	-0.075659	7.47272e-06
VCAN-REACTOME_MITOPHAGY	-0.298146	-0.243654	-0.187579	1.66385e-16
KIF20A-REACTOME_MITOPHAGY	-0.0197228	0.0390831	0.0976195	0.192606
HMMR-REACTOME_MITOPHAGY	-0.0819436	-0.0232952	0.035514	0.437514
IER3-REACTOME_MITOPHAGY	-0.25383	-0.198023	-0.140902	2.64539e-11
PGK2-REACTOME_MITOPHAGY	0.01402	0.0727206	0.130922	0.0152424
ME1-REACTOME_MITOPHAGY	-0.0303986	0.0284127	0.087028	0.343628
NT5E-REACTOME_MITOPHAGY	-0.270285	-0.214938	-0.158175	4.2453e-13
RRAGD-REACTOME_MITOPHAGY	-0.130534	-0.0723279	-0.0136252	0.0158032
EGFR-REACTOME_MITOPHAGY	-0.178926	-0.121442	-0.0631318	4.86557e-05
CLDN3-REACTOME_MITOPHAGY	-0.134943	-0.0767915	-0.0181126	0.0103833
MET-REACTOME_MITOPHAGY	-0.158382	-0.100557	-0.0420449	0.000780844
GFUS-REACTOME_MITOPHAGY	-0.154753	-0.0968736	-0.0383312	0.00121283
VLDLR-REACTOME_MITOPHAGY	-0.222804	-0.16622	-0.108519	2.43312e-08
FBP1-REACTOME_MITOPHAGY	-0.283927	-0.228986	-0.172547	1.04414e-14
COL5A1-REACTOME_MITOPHAGY	-0.311509	-0.257462	-0.201753	2.60996e-18
PFKFB3-REACTOME_MITOPHAGY	-0.293011	-0.238354	-0.182144	7.66846e-16
CDK1-REACTOME_MITOPHAGY	-0.028269	0.0305423	0.0891429	0.308661
P4HA1-REACTOME_MITOPHAGY	-0.194828	-0.137644	-0.0795262	4.04983e-06
LDHC-REACTOME_MITOPHAGY	-0.0738704	-0.0151757	0.0436237	0.613034
CHST1-REACTOME_MITOPHAGY	-0.16997	-0.112331	-0.0539264	0.000173184
PC-REACTOME_MITOPHAGY	-0.251538	-0.19567	-0.138501	4.57129e-11
PPP2R1B-REACTOME_MITOPHAGY	-0.232595	-0.176243	-0.118712	3.22804e-09
B3GAT1-REACTOME_MITOPHAGY	-0.0926583	-0.0340833	0.0247268	0.255904
FKBP4-REACTOME_MITOPHAGY	-0.179681	-0.122211	-0.0639089	4.35304e-05
GAPDH-REACTOME_MITOPHAGY	-0.127958	-0.069722	-0.0110065	0.0200047
ENO2-REACTOME_MITOPHAGY	-0.168487	-0.110823	-0.052404	0.0002118
GYS2-REACTOME_MITOPHAGY	-0.0797817	-0.0211202	0.0376872	0.481501
DCN-REACTOME_MITOPHAGY	-0.345957	-0.293156	-0.238504	1.69473e-23
ALDH2-REACTOME_MITOPHAGY	-0.298215	-0.243726	-0.187652	1.62941e-16
IRS2-REACTOME_MITOPHAGY	-0.283548	-0.228596	-0.172148	1.16123e-14
EGLN3-REACTOME_MITOPHAGY	-0.197923	-0.1408	-0.0827234	2.41072e-06
PYGL-REACTOME_MITOPHAGY	-0.219834	-0.163181	-0.105432	4.38457e-08
FUT8-REACTOME_MITOPHAGY	-0.270733	-0.215399	-0.158646	3.77456e-13
ISG20-REACTOME_MITOPHAGY	-0.0915714	-0.0329883	0.0258223	0.271504
ALDH1A3-REACTOME_MITOPHAGY	-0.218223	-0.161533	-0.103758	6.0073e-08
POLR3K-REACTOME_MITOPHAGY	-0.201223	-0.144167	-0.086136	1.36882e-06
CACNA1H-REACTOME_MITOPHAGY	-0.0747817	-0.0160919	0.0427091	0.591763
PGP-REACTOME_MITOPHAGY	-0.0988222	-0.0402956	0.0185088	0.179154
CLDN9-REACTOME_MITOPHAGY	-0.0233598	0.0354494	0.0940142	0.237327
ALDOA-REACTOME_MITOPHAGY	-0.148014	-0.0900369	-0.0314426	0.00264264
CHST6-REACTOME_MITOPHAGY	-0.180623	-0.123169	-0.0648784	3.78518e-05
SLC2A4-REACTOME_MITOPHAGY	-0.205854	-0.148894	-0.0909293	6.04991e-07
ALDH3A1-REACTOME_MITOPHAGY	-0.06543	-0.00669514	0.0520859	0.823448
ALDOC-REACTOME_MITOPHAGY	-0.0905718	-0.0319814	0.0268296	0.286412
SLC4A1-REACTOME_MITOPHAGY	-0.043645	0.0151544	0.0738492	0.613532
SLC25A10-REACTOME_MITOPHAGY	-0.0155714	0.0432288	0.101731	0.149518
SLC16A3-REACTOME_MITOPHAGY	-0.0883745	-0.0297685	0.0290429	0.321086
ANGPTL4-REACTOME_MITOPHAGY	-0.122246	-0.0639445	-0.00520347	0.0329181
GAPDHS-REACTOME_MITOPHAGY	0.135755	0.192976	0.248914	8.47719e-11
ACSS2-REACTOME_MITOPHAGY	-0.26856	-0.213163	-0.156361	6.66087e-13
SPAG4-REACTOME_MITOPHAGY	0.0463456	0.104821	0.16258	0.000460538
AURKA-REACTOME_MITOPHAGY	0.028385	0.0870005	0.14502	0.00367573
PCK1-REACTOME_MITOPHAGY	-0.188016	-0.1307	-0.0724961	1.21856e-05
TFF3-REACTOME_MITOPHAGY	-0.181997	-0.124568	-0.066293	3.08122e-05
GAL3ST1-REACTOME_MITOPHAGY	-0.114785	-0.0564047	0.00236366	0.059953
KDELR3-REACTOME_MITOPHAGY	-0.155136	-0.0972616	-0.0387223	0.00115866
BIK-REACTOME_MITOPHAGY	-0.181401	-0.123962	-0.0656798	3.36958e-05
MIOX-REACTOME_MITOPHAGY	-0.00447355	0.0543013	0.112702	0.0701592
PFKFB1-REACTOME_MITOPHAGY	-0.140128	-0.0820434	-0.0233957	0.00616925
GPC4-REACTOME_MITOPHAGY	-0.289307	-0.234534	-0.178229	2.255e-15
GPC3-REACTOME_MITOPHAGY	-0.270954	-0.215627	-0.158879	3.56111e-13
TKTL1-REACTOME_MITOPHAGY	-0.0963214	-0.0377746	0.0210327	0.207938
GALE-REACTOME_PINK1_PRKN_MEDIATED_MITOPHAGY	-0.124566	-0.066291	-0.00755987	0.0269995
STMN1-REACTOME_PINK1_PRKN_MEDIATED_MITOPHAGY	-0.126498	-0.0682447	-0.00952234	0.022795
SLC2A1-REACTOME_PINK1_PRKN_MEDIATED_MITOPHAGY	-0.189026	-0.131729	-0.0735372	1.03863e-05
ARTN-REACTOME_PINK1_PRKN_MEDIATED_MITOPHAGY	-0.136823	-0.0786954	-0.0200274	0.00862597
PGM1-REACTOME_PINK1_PRKN_MEDIATED_MITOPHAGY	-0.273524	-0.218272	-0.161584	1.80256e-13
AK4-REACTOME_PINK1_PRKN_MEDIATED_MITOPHAGY	-0.144677	-0.0866534	-0.0280356	0.00381466
DEPDC1-REACTOME_PINK1_PRKN_MEDIATED_MITOPHAGY	-0.0425332	0.016268	0.074957	0.587712
EFNA3-REACTOME_PINK1_PRKN_MEDIATED_MITOPHAGY	-0.0465467	0.0122474	0.0709569	0.683164
LHX9-REACTOME_PINK1_PRKN_MEDIATED_MITOPHAGY	-0.051587	0.00719539	0.0659281	0.810498
PPFIA4-REACTOME_PINK1_PRKN_MEDIATED_MITOPHAGY	-0.145319	-0.0873036	-0.0286902	0.00355819
SDC1-REACTOME_PINK1_PRKN_MEDIATED_MITOPHAGY	-0.231456	-0.175076	-0.117525	4.10925e-09
CENPA-REACTOME_PINK1_PRKN_MEDIATED_MITOPHAGY	0.00550512	0.0642449	0.122543	0.0321033
UGP2-REACTOME_PINK1_PRKN_MEDIATED_MITOPHAGY	-0.319097	-0.265311	-0.209822	2.19431e-19
LCT-REACTOME_PINK1_PRKN_MEDIATED_MITOPHAGY	-0.00179566	0.0569709	0.115345	0.0574263
CXCR4-REACTOME_PINK1_PRKN_MEDIATED_MITOPHAGY	-0.21387	-0.157083	-0.0992385	1.38372e-07
CHPF-REACTOME_PINK1_PRKN_MEDIATED_MITOPHAGY	-0.291505	-0.236801	-0.180553	1.19159e-15
NUP210-REACTOME_PINK1_PRKN_MEDIATED_MITOPHAGY	-0.25069	-0.194799	-0.137614	5.58646e-11
PFKFB4-REACTOME_PINK1_PRKN_MEDIATED_MITOPHAGY	-0.223482	-0.166913	-0.109224	2.12413e-08
ADH4-REACTOME_PINK1_PRKN_MEDIATED_MITOPHAGY	-0.0215536	0.0372541	0.095805	0.214276
ADH6-REACTOME_PINK1_PRKN_MEDIATED_MITOPHAGY	0.000121501	0.0588817	0.117237	0.0495433
ADH1A-REACTOME_PINK1_PRKN_MEDIATED_MITOPHAGY	-0.08074	-0.0220842	0.036724	0.461713
ADH1B-REACTOME_PINK1_PRKN_MEDIATED_MITOPHAGY	-0.221442	-0.164826	-0.107103	3.19208e-08
ADH1C-REACTOME_PINK1_PRKN_MEDIATED_MITOPHAGY	-0.193393	-0.13618	-0.0780437	5.13166e-06
SAP30-REACTOME_PINK1_PRKN_MEDIATED_MITOPHAGY	-0.212596	-0.155782	-0.0979177	1.75835e-07
VCAN-REACTOME_PINK1_PRKN_MEDIATED_MITOPHAGY	-0.276963	-0.221812	-0.165205	7.14718e-14
KIF20A-REACTOME_PINK1_PRKN_MEDIATED_MITOPHAGY	-0.0500262	0.00876014	0.067486	0.77034
HMMR-REACTOME_PINK1_PRKN_MEDIATED_MITOPHAGY	-0.109428	-0.0509954	0.00778856	0.0890399
IER3-REACTOME_PINK1_PRKN_MEDIATED_MITOPHAGY	-0.244664	-0.188615	-0.131309	2.26157e-10
PGK2-REACTOME_PINK1_PRKN_MEDIATED_MITOPHAGY	0.0458274	0.104307	0.162074	0.000491292
ME1-REACTOME_PINK1_PRKN_MEDIATED_MITOPHAGY	-0.0280182	0.0307931	0.0893919	0.304704
NT5E-REACTOME_PINK1_PRKN_MEDIATED_MITOPHAGY	-0.262005	-0.206422	-0.149475	3.55394e-12
RRAGD-REACTOME_PINK1_PRKN_MEDIATED_MITOPHAGY	-0.147128	-0.0891379	-0.0305373	0.00291681
EGFR-REACTOME_PINK1_PRKN_MEDIATED_MITOPHAGY	-0.187593	-0.130268	-0.0720589	1.30265e-05
CLDN3-REACTOME_PINK1_PRKN_MEDIATED_MITOPHAGY	-0.150619	-0.0926783	-0.0341034	0.00196753
MET-REACTOME_PINK1_PRKN_MEDIATED_MITOPHAGY	-0.157021	-0.0991752	-0.0406515	0.000922678
GFUS-REACTOME_PINK1_PRKN_MEDIATED_MITOPHAGY	-0.16357	-0.105826	-0.0473602	0.000405458
VLDLR-REACTOME_PINK1_PRKN_MEDIATED_MITOPHAGY	-0.219002	-0.162331	-0.104568	5.16025e-08
FBP1-REACTOME_PINK1_PRKN_MEDIATED_MITOPHAGY	-0.259454	-0.2038	-0.146798	6.71276e-12
COL5A1-REACTOME_PINK1_PRKN_MEDIATED_MITOPHAGY	-0.281507	-0.226493	-0.169995	2.05266e-14
PFKFB3-REACTOME_PINK1_PRKN_MEDIATED_MITOPHAGY	-0.282844	-0.22787	-0.171405	1.41451e-14
CDK1-REACTOME_PINK1_PRKN_MEDIATED_MITOPHAGY	-0.0548729	0.00390022	0.0626464	0.896588
P4HA1-REACTOME_PINK1_PRKN_MEDIATED_MITOPHAGY	-0.18164	-0.124206	-0.0659261	3.2508e-05
LDHC-REACTOME_PINK1_PRKN_MEDIATED_MITOPHAGY	-0.0922543	-0.0336763	0.0251341	0.261628
CHST1-REACTOME_PINK1_PRKN_MEDIATED_MITOPHAGY	-0.163666	-0.105924	-0.0474591	0.000400428
PC-REACTOME_PINK1_PRKN_MEDIATED_MITOPHAGY	-0.247288	-0.191307	-0.134053	1.2375e-10
PPP2R1B-REACTOME_PINK1_PRKN_MEDIATED_MITOPHAGY	-0.250468	-0.194571	-0.137381	5.88697e-11
B3GAT1-REACTOME_PINK1_PRKN_MEDIATED_MITOPHAGY	-0.124133	-0.0658531	-0.00712008	0.0280287
FKBP4-REACTOME_PINK1_PRKN_MEDIATED_MITOPHAGY	-0.206999	-0.150064	-0.0921155	4.92389e-07
GAPDH-REACTOME_PINK1_PRKN_MEDIATED_MITOPHAGY	-0.133503	-0.0753336	-0.0166467	0.011937
ENO2-REACTOME_PINK1_PRKN_MEDIATED_MITOPHAGY	-0.16208	-0.104313	-0.0458335	0.000490921
GYS2-REACTOME_PINK1_PRKN_MEDIATED_MITOPHAGY	-0.0648269	-0.00608954	0.0526899	0.839189
DCN-REACTOME_PINK1_PRKN_MEDIATED_MITOPHAGY	-0.309403	-0.255283	-0.199516	5.11232e-18
ALDH2-REACTOME_PINK1_PRKN_MEDIATED_MITOPHAGY	-0.273198	-0.217936	-0.16124	1.96635e-13
IRS2-REACTOME_PINK1_PRKN_MEDIATED_MITOPHAGY	-0.285631	-0.230744	-0.174347	6.45314e-15
EGLN3-REACTOME_PINK1_PRKN_MEDIATED_MITOPHAGY	-0.154687	-0.0968062	-0.0382633	0.00122248
PYGL-REACTOME_PINK1_PRKN_MEDIATED_MITOPHAGY	-0.193445	-0.136233	-0.0780976	5.08787e-06
FUT8-REACTOME_PINK1_PRKN_MEDIATED_MITOPHAGY	-0.256643	-0.200912	-0.14385	1.33947e-11
ISG20-REACTOME_PINK1_PRKN_MEDIATED_MITOPHAGY	-0.0965268	-0.0379816	0.0208254	0.205455
ALDH1A3-REACTOME_PINK1_PRKN_MEDIATED_MITOPHAGY	-0.209594	-0.152714	-0.0948044	3.06947e-07
POLR3K-REACTOME_PINK1_PRKN_MEDIATED_MITOPHAGY	-0.206016	-0.14906	-0.0910973	5.87652e-07
CACNA1H-REACTOME_PINK1_PRKN_MEDIATED_MITOPHAGY	-0.100186	-0.0416702	0.0171323	0.164763
PGP-REACTOME_PINK1_PRKN_MEDIATED_MITOPHAGY	-0.0901254	-0.0315318	0.0272793	0.293244
CLDN9-REACTOME_PINK1_PRKN_MEDIATED_MITOPHAGY	-0.0423836	0.0164179	0.075106	0.584276
ALDOA-REACTOME_PINK1_PRKN_MEDIATED_MITOPHAGY	-0.151412	-0.0934829	-0.0349141	0.00179578
CHST6-REACTOME_PINK1_PRKN_MEDIATED_MITOPHAGY	-0.200509	-0.143438	-0.0853971	1.54894e-06
SLC2A4-REACTOME_PINK1_PRKN_MEDIATED_MITOPHAGY	-0.196565	-0.139415	-0.0813204	3.03112e-06
ALDH3A1-REACTOME_PINK1_PRKN_MEDIATED_MITOPHAGY	-0.0731682	-0.0144699	0.0443284	0.629648
ALDOC-REACTOME_PINK1_PRKN_MEDIATED_MITOPHAGY	-0.108496	-0.0500541	0.00873214	0.0951059
SLC4A1-REACTOME_PINK1_PRKN_MEDIATED_MITOPHAGY	-0.0630392	-0.00429458	0.0544797	0.8862
SLC25A10-REACTOME_PINK1_PRKN_MEDIATED_MITOPHAGY	-0.0150306	0.0437686	0.102266	0.144496
SLC16A3-REACTOME_PINK1_PRKN_MEDIATED_MITOPHAGY	-0.108333	-0.04989	0.00889663	0.0961965
ANGPTL4-REACTOME_PINK1_PRKN_MEDIATED_MITOPHAGY	-0.110302	-0.0518777	0.0069039	0.0836398
GAPDHS-REACTOME_PINK1_PRKN_MEDIATED_MITOPHAGY	0.118032	0.175575	0.231943	3.70721e-09
ACSS2-REACTOME_PINK1_PRKN_MEDIATED_MITOPHAGY	-0.262096	-0.206516	-0.149571	3.47339e-12
SPAG4-REACTOME_PINK1_PRKN_MEDIATED_MITOPHAGY	0.0394598	0.0979932	0.155856	0.00106254
AURKA-REACTOME_PINK1_PRKN_MEDIATED_MITOPHAGY	-0.0148573	0.0439416	0.102438	0.142914
PCK1-REACTOME_PINK1_PRKN_MEDIATED_MITOPHAGY	-0.176001	-0.118465	-0.0601233	7.4413e-05
TFF3-REACTOME_PINK1_PRKN_MEDIATED_MITOPHAGY	-0.153005	-0.0950995	-0.0365431	0.00149161
GAL3ST1-REACTOME_PINK1_PRKN_MEDIATED_MITOPHAGY	-0.130224	-0.0720141	-0.0133099	0.0162643
KDELR3-REACTOME_PINK1_PRKN_MEDIATED_MITOPHAGY	-0.155763	-0.0978988	-0.0393647	0.00107451
BIK-REACTOME_PINK1_PRKN_MEDIATED_MITOPHAGY	-0.165178	-0.10746	-0.0490094	0.000328862
MIOX-REACTOME_PINK1_PRKN_MEDIATED_MITOPHAGY	-0.0393189	0.0194867	0.0781577	0.516055
PFKFB1-REACTOME_PINK1_PRKN_MEDIATED_MITOPHAGY	-0.0976657	-0.0391297	0.0196762	0.192076
GPC4-REACTOME_PINK1_PRKN_MEDIATED_MITOPHAGY	-0.256414	-0.200677	-0.143609	1.41638e-11
GPC3-REACTOME_PINK1_PRKN_MEDIATED_MITOPHAGY	-0.251496	-0.195626	-0.138457	4.61721e-11
TKTL1-REACTOME_PINK1_PRKN_MEDIATED_MITOPHAGY	-0.0819381	-0.0232897	0.0355195	0.437623
GALE-REACTOME_RECEPTOR_MEDIATED_MITOPHAGY	-0.117828	-0.0594796	-0.000721585	0.0472708
STMN1-REACTOME_RECEPTOR_MEDIATED_MITOPHAGY	-0.0367944	0.0220138	0.08067	0.463144
SLC2A1-REACTOME_RECEPTOR_MEDIATED_MITOPHAGY	-0.0901271	-0.0315336	0.0272776	0.293217
ARTN-REACTOME_RECEPTOR_MEDIATED_MITOPHAGY	-0.115738	-0.0573673	0.001398	0.0557106
PGM1-REACTOME_RECEPTOR_MEDIATED_MITOPHAGY	-0.236697	-0.180446	-0.12299	1.33557e-09
AK4-REACTOME_RECEPTOR_MEDIATED_MITOPHAGY	-0.122951	-0.0646575	-0.0059194	0.0310124
DEPDC1-REACTOME_RECEPTOR_MEDIATED_MITOPHAGY	0.018308	0.0769858	0.135135	0.0101904
EFNA3-REACTOME_RECEPTOR_MEDIATED_MITOPHAGY	-0.0387969	0.0200093	0.0786774	0.504862
LHX9-REACTOME_RECEPTOR_MEDIATED_MITOPHAGY	-0.0722568	-0.0135538	0.0452428	0.651492
PPFIA4-REACTOME_RECEPTOR_MEDIATED_MITOPHAGY	-0.0925404	-0.0339645	0.0248457	0.257565
SDC1-REACTOME_RECEPTOR_MEDIATED_MITOPHAGY	-0.180267	-0.122807	-0.0645122	3.99087e-05
CENPA-REACTOME_RECEPTOR_MEDIATED_MITOPHAGY	0.0643918	0.122688	0.18015	4.06077e-05
UGP2-REACTOME_RECEPTOR_MEDIATED_MITOPHAGY	-0.218362	-0.161676	-0.103903	5.84603e-08
LCT-REACTOME_RECEPTOR_MEDIATED_MITOPHAGY	0.0412031	0.0997222	0.15756	0.000863896
CXCR4-REACTOME_RECEPTOR_MEDIATED_MITOPHAGY	-0.164191	-0.106457	-0.0479968	0.000374105
CHPF-REACTOME_RECEPTOR_MEDIATED_MITOPHAGY	-0.237638	-0.18141	-0.123971	1.08757e-09
NUP210-REACTOME_RECEPTOR_MEDIATED_MITOPHAGY	-0.196746	-0.1396	-0.0815078	2.94017e-06
PFKFB4-REACTOME_RECEPTOR_MEDIATED_MITOPHAGY	-0.138453	-0.0803462	-0.021688	0.00732258
ADH4-REACTOME_RECEPTOR_MEDIATED_MITOPHAGY	-0.0315264	0.0272847	0.0859075	0.363134
ADH6-REACTOME_RECEPTOR_MEDIATED_MITOPHAGY	-0.0124684	0.0463261	0.104801	0.122441
ADH1A-REACTOME_RECEPTOR_MEDIATED_MITOPHAGY	-0.10568	-0.0472127	0.01158	0.115441
ADH1B-REACTOME_RECEPTOR_MEDIATED_MITOPHAGY	-0.211052	-0.154204	-0.0963159	2.34517e-07
ADH1C-REACTOME_RECEPTOR_MEDIATED_MITOPHAGY	-0.195111	-0.137931	-0.0798177	3.86451e-06
SAP30-REACTOME_RECEPTOR_MEDIATED_MITOPHAGY	-0.123783	-0.0654987	-0.00676419	0.0288861
VCAN-REACTOME_RECEPTOR_MEDIATED_MITOPHAGY	-0.246058	-0.190045	-0.132767	1.64352e-10
KIF20A-REACTOME_RECEPTOR_MEDIATED_MITOPHAGY	0.00734685	0.0660789	0.124357	0.0274939
HMMR-REACTOME_RECEPTOR_MEDIATED_MITOPHAGY	-0.0557935	0.00297685	0.0617266	0.920979
IER3-REACTOME_RECEPTOR_MEDIATED_MITOPHAGY	-0.226932	-0.170444	-0.112814	1.05379e-08
PGK2-REACTOME_RECEPTOR_MEDIATED_MITOPHAGY	-0.0076143	0.0511692	0.1096	0.0879546
ME1-REACTOME_RECEPTOR_MEDIATED_MITOPHAGY	-0.0251293	0.033681	0.0922589	0.261561
NT5E-REACTOME_RECEPTOR_MEDIATED_MITOPHAGY	-0.197499	-0.140367	-0.0822851	2.5901e-06
RRAGD-REACTOME_RECEPTOR_MEDIATED_MITOPHAGY	-0.099261	-0.040738	0.0180658	0.174424
EGFR-REACTOME_RECEPTOR_MEDIATED_MITOPHAGY	-0.123399	-0.065111	-0.00637482	0.02985
CLDN3-REACTOME_RECEPTOR_MEDIATED_MITOPHAGY	-0.108592	-0.0501515	0.00863448	0.0944631
MET-REACTOME_RECEPTOR_MEDIATED_MITOPHAGY	-0.112646	-0.0542446	0.00453044	0.070453
GFUS-REACTOME_RECEPTOR_MEDIATED_MITOPHAGY	-0.138417	-0.0803101	-0.0216517	0.00734907
VLDLR-REACTOME_RECEPTOR_MEDIATED_MITOPHAGY	-0.169765	-0.112123	-0.0537164	0.000178086
FBP1-REACTOME_RECEPTOR_MEDIATED_MITOPHAGY	-0.229082	-0.172645	-0.115052	6.75762e-09
COL5A1-REACTOME_RECEPTOR_MEDIATED_MITOPHAGY	-0.245824	-0.189805	-0.132522	1.73423e-10
PFKFB3-REACTOME_RECEPTOR_MEDIATED_MITOPHAGY	-0.253642	-0.19783	-0.140705	2.76765e-11
CDK1-REACTOME_RECEPTOR_MEDIATED_MITOPHAGY	-0.00552342	0.0532544	0.111666	0.0757461
P4HA1-REACTOME_RECEPTOR_MEDIATED_MITOPHAGY	-0.146103	-0.0880986	-0.0294907	0.00326592
LDHC-REACTOME_RECEPTOR_MEDIATED_MITOPHAGY	-0.070566	-0.0118546	0.0469387	0.6928
CHST1-REACTOME_RECEPTOR_MEDIATED_MITOPHAGY	-0.126395	-0.0681409	-0.009418	0.0230033
PC-REACTOME_RECEPTOR_MEDIATED_MITOPHAGY	-0.206317	-0.149367	-0.0914087	5.56775e-07
PPP2R1B-REACTOME_RECEPTOR_MEDIATED_MITOPHAGY	-0.193093	-0.135874	-0.0777339	5.39027e-06
B3GAT1-REACTOME_RECEPTOR_MEDIATED_MITOPHAGY	-0.0538781	0.00489796	0.0636402	0.870344
FKBP4-REACTOME_RECEPTOR_MEDIATED_MITOPHAGY	-0.143313	-0.085271	-0.0266439	0.00441651
GAPDH-REACTOME_RECEPTOR_MEDIATED_MITOPHAGY	-0.115457	-0.0570842	0.00168203	0.0569316
ENO2-REACTOME_RECEPTOR_MEDIATED_MITOPHAGY	-0.139676	-0.0815849	-0.0229343	0.00646351
GYS2-REACTOME_RECEPTOR_MEDIATED_MITOPHAGY	-0.0737479	-0.0150525	0.0437467	0.61592
DCN-REACTOME_RECEPTOR_MEDIATED_MITOPHAGY	-0.284733	-0.229818	-0.173399	8.31886e-15
ALDH2-REACTOME_RECEPTOR_MEDIATED_MITOPHAGY	-0.277415	-0.222278	-0.165681	6.32101e-14
IRS2-REACTOME_RECEPTOR_MEDIATED_MITOPHAGY	-0.221796	-0.165189	-0.107471	2.97513e-08
EGLN3-REACTOME_RECEPTOR_MEDIATED_MITOPHAGY	-0.209801	-0.152926	-0.0950194	2.95466e-07
PYGL-REACTOME_RECEPTOR_MEDIATED_MITOPHAGY	-0.215416	-0.158663	-0.100843	1.0316e-07
FUT8-REACTOME_RECEPTOR_MEDIATED_MITOPHAGY	-0.23935	-0.183166	-0.125759	7.46082e-10
ISG20-REACTOME_RECEPTOR_MEDIATED_MITOPHAGY	-0.0687112	-0.00999093	0.0487983	0.739174
ALDH1A3-REACTOME_RECEPTOR_MEDIATED_MITOPHAGY	-0.182008	-0.124579	-0.0663041	3.07624e-05
POLR3K-REACTOME_RECEPTOR_MEDIATED_MITOPHAGY	-0.175144	-0.117594	-0.0592426	8.41139e-05
CACNA1H-REACTOME_RECEPTOR_MEDIATED_MITOPHAGY	-0.0751246	-0.0164365	0.0423649	0.583849
PGP-REACTOME_RECEPTOR_MEDIATED_MITOPHAGY	-0.0868608	-0.0282444	0.0305669	0.346495
CLDN9-REACTOME_RECEPTOR_MEDIATED_MITOPHAGY	-0.00391905	0.0548542	0.11325	0.0673477
ALDOA-REACTOME_RECEPTOR_MEDIATED_MITOPHAGY	-0.136826	-0.0786981	-0.0200302	0.00862364
CHST6-REACTOME_RECEPTOR_MEDIATED_MITOPHAGY	-0.10611	-0.0476461	0.0111457	0.112135
SLC2A4-REACTOME_RECEPTOR_MEDIATED_MITOPHAGY	-0.163026	-0.105274	-0.0468027	0.000434913
ALDH3A1-REACTOME_RECEPTOR_MEDIATED_MITOPHAGY	-0.0848506	-0.0262208	0.03259	0.382153
ALDOC-REACTOME_RECEPTOR_MEDIATED_MITOPHAGY	-0.0615082	-0.00275758	0.0560121	0.926782
SLC4A1-REACTOME_RECEPTOR_MEDIATED_MITOPHAGY	-0.0215913	0.0372165	0.0957676	0.21474
SLC25A10-REACTOME_RECEPTOR_MEDIATED_MITOPHAGY	-0.0220054	0.0368028	0.0953571	0.219884
SLC16A3-REACTOME_RECEPTOR_MEDIATED_MITOPHAGY	-0.0734986	-0.0148019	0.0439969	0.621809
ANGPTL4-REACTOME_RECEPTOR_MEDIATED_MITOPHAGY	-0.0890165	-0.030415	0.0283963	0.310683
GAPDHS-REACTOME_RECEPTOR_MEDIATED_MITOPHAGY	0.0901354	0.148112	0.205087	6.93799e-07
ACSS2-REACTOME_RECEPTOR_MEDIATED_MITOPHAGY	-0.201223	-0.144167	-0.0861363	1.36876e-06
SPAG4-REACTOME_RECEPTOR_MEDIATED_MITOPHAGY	0.0456372	0.104119	0.161889	0.000503053
AURKA-REACTOME_RECEPTOR_MEDIATED_MITOPHAGY	0.0600701	0.118413	0.175949	7.49668e-05
PCK1-REACTOME_RECEPTOR_MEDIATED_MITOPHAGY	-0.150499	-0.0925569	-0.0339811	0.00199471
TFF3-REACTOME_RECEPTOR_MEDIATED_MITOPHAGY	-0.157303	-0.0994622	-0.040941	0.000891384
GAL3ST1-REACTOME_RECEPTOR_MEDIATED_MITOPHAGY	-0.106682	-0.0482241	0.0105664	0.107843
KDELR3-REACTOME_RECEPTOR_MEDIATED_MITOPHAGY	-0.109422	-0.0509888	0.00779508	0.0890808
BIK-REACTOME_RECEPTOR_MEDIATED_MITOPHAGY	-0.144	-0.085967	-0.0273445	0.00410353
MIOX-REACTOME_RECEPTOR_MEDIATED_MITOPHAGY	-0.00653772	0.0522429	0.110664	0.0814837
PFKFB1-REACTOME_RECEPTOR_MEDIATED_MITOPHAGY	-0.137227	-0.0791043	-0.0204387	0.00828514
GPC4-REACTOME_RECEPTOR_MEDIATED_MITOPHAGY	-0.237361	-0.181127	-0.123682	1.15549e-09
GPC3-REACTOME_RECEPTOR_MEDIATED_MITOPHAGY	-0.240546	-0.184392	-0.127008	5.72094e-10
TKTL1-REACTOME_RECEPTOR_MEDIATED_MITOPHAGY	-0.0953425	-0.036788	0.0220201	0.220069
